# Supplementary material
Source: publisher figshare collection journal article supplement (https://brill.figshare.com/articles/dataset/_/11352167)
Supplement: Supplementary file 1 [file 1]

## Sheet: Hcordobae
	GLM		ANN		RF		Global
Species	TSS	ROC	TSS	ROC	TSS	ROC	TSS	ROC
B. cordobae	0.769	0.905	0.736	0.874	0.769	0.877
B. cordobae	0.856	0.962	0.79	0.931	0.89	0.951
B. cordobae	0.713	0.928	0.692	0.887	0.779	0.927
	0.779333	0.931667	0.739333	0.897333	0.812667	0.918333	0.777111	0.915778
Melanophryniscus spp.	0.633	0.817	0.933	0.967	0.833	0.933
Melanophryniscus spp.	0.867	0.957	0.9	0.983	0.9	0.977
Melanophryniscus spp.	0.8	0.9	0.833	0.948	0.833	0.967
	0.766667	0.891333	0.888667	0.966	0.855333	0.959	0.836889	0.938778
O. achalensis	1	1	1	1	1	1
O. achalensis	0.967	0.983	0.967	0.993	1	1
O. achalensis	0.6	0.8	1	1	1	1
	0.855667	0.927667	0.989	0.997667	1	1	0.948222	0.975111
O. cordobae	0.357	0.693	0.467	0.621	0.6	0.867
O. cordobae	0.767	0.938	0.833	0.869	0.933	0.971
O. cordobae	0.429	0.738	0.633	0.852	0.767	0.852
	0.517667	0.789667	0.644333	0.780667	0.766667	0.896667	0.642889	0.822333
Pleurodema spp.	1	1	0.933	0.983	1	1
Pleurodema spp.	0.733	0.867	0.733	0.947	0.933	0.973
Pleurodema spp.	1	1	1	1	1	1
	0.911	0.955667	0.888667	0.976667	0.977667	0.991	0.925778	0.974444
R. achalensis	0.967	0.983	1	0.86	1	0.96
R. achalensis	0.967	0.983	0.99	1	1	0.95
R. achalensis	1	1	1	0.96	0.99	0.98
	0.978	0.988667	0.996667	0.94	0.996667	0.963333	0.990444	0.964
