# Supplementary material
Source: publisher figshare collection journal article supplement (https://brill.figshare.com/articles/dataset/_/11352167)
Supplement: Supplementary file 1 [file 1]

# Climate change threatens micro-endemic amphibians of an important South American high-altitude center of endemism

Javier M. Cordier<sup>1,2</sup>, Julián N. Lescano<sup>1,2</sup>, Natalia E. Ríos<sup>2</sup>, Gerardo C. Leynaud<sup>1,2</sup>,  
Javier Nori<sup>1,2,\*</sup>

1 - Instituto de Diversidad y Ecología Animal (IDEA-CONICET), Córdoba, Argentina

2 - Centro de Zoología Aplicada, Universidad Nacional de Córdoba, Rondeau 798, Córdoba, Argentina

\*Corresponding author; e-mail: javiernori@gmail.com

**Supplementary material**
